# Supplementary material for: Does the Time of Day at Which Endocrine Therapy Is Taken Affect Breast Cancer Patient Outcomes?
Source: MDPI journal article supplement (doi:10.3390/curroncol28040229), 2021-07-06
Supplement: s1 [file s1]

## Supplemental Figure S1: Search Strategy 1

Database: Embase Classic+Embase <1947 to 2020 August 26> , Ovid MEDLINE(R) ALL  
<1946 to August 26, 2020>, EBM Reviews - Cochrane Central Register of Controlled Trials  
<July 2020>

Search Strategy:

- 
- 1 exp Breast Neoplasms/ (863076)
  - 2 (breast adj2 (cancer or neoplasm\* or tumor\* or carcinoma\*)).tw. (771998)
  - 3 (breast and (cancer or neoplasm\* or tumor\* or carcinoma\*)).kf. (59576)
  - 4 or/1-3 (1032377)
  - 5 exp Aromatase Inhibitors/ (42347)
  - 6 Aromatase inhibitor\*.tw,kw. (21929)
  - 7 exp Tamoxifen/ (85879)
  - 8 (tamoxifen or anastrozole or exemestane or Fadrozole or formestane or intraovarian  
peptides or letrozole or plomestane or vorozole).tw,kw. (74869)
  - 9 Antineoplastic Agents, Hormonal/tu (10910)
  - 10 ((hormon\* or endocrin\* or systemic) adj (treatment or therapy)).tw. (170669)
  - 11 or/5-10 (287655)
  - 12 4 and 11 (112785)
  - 13 \*Time Factors/ (3708)
  - 14 "time of day".tw,kw. (25635)
  - 15 time of administration.tw,kw. (8785)
  - 16 Circadian Rhythm/ (166802)
  - 17 chronobiology.mp. (7852)
  - 18 (morning or night\*).tw,kw. (353070)
  - 19 daytime.mp. or Diurnal\*.tw,kw. (149917)
  - 20 bedtime.mp. (23353)
  - 21 (chronotherap\* or chrono therap\*).tw,kw. (3862)
  - 22 evening.tw,kw. (56243)
  - 23 (breakfast\* or supper\*).tw,kw. (33205)
  - 24 chronotherapy/ or drug chronotherapy/ (5382)
  - 25 (chronopharmacokinetic\* or chronopharmacolog\* or chrono pharmaco\*).tw,kw.  
(1951)
  - 26 or/13-25 (637211)
  - 27 12 and 26 (666)
  - 28 exp animals/ not humans/ (17755478)

29 27 not 28 (474)

30 limit 29 to english language (416)

**31 30 use medall (145) Medline**

32 exp \*breast cancer/ (571662)

33 (breast adj2 (cancer or neoplasm\* or tumor\* or carcinoma\*)).tw. (771998)

34 32 or 33 (875465)

35 \*cancer hormone therapy/ (4582)

36 exp aromatase inhibitor/ or aromatase inhibitor\*.tw. (47742)

37 tamoxifen/ (83676)

38 (tamoxifen or anastrozole or exemestane or Fadozole or formestane or intraovarian peptides or letrozole or plomestane or vorozole).tw. (73976)

39 \*"antineoplastic hormone agonists and antagonists"/ (1674)

40 ((hormon\* or endocrin\* or systemic) adj (treatment or therapy)).tw. (170669)

41 or/35-40 (282483)

42 34 and 41 (103361)

43 circadian rhythm/ (166802)

44 "time of day".tw. (25546)

45 chronobiology.tw. (2801)

46 chronobiology/ (3431)

47 (morning or night\*).tw. (351338)

48 (daytime or bedtime).tw. (99406)

49 evening.tw. (55670)

50 (breakfast\* or supper\*).tw. (33075)

51 chronotherapy/ or chronopharmacology/ (5240)

52 (chronotherap\* or chronopharmacokinetic\* or chronopharmacolog\*).tw. (4599)

53 \*time factor/ (3767)

54 or/43-53 (594385)

55 42 and 54 (552)

56 (exp animal/ or nonhuman/) not exp human/ (11945907)

57 55 not 56 (545)

58 limit 57 to english language (492)

**59 58 use emcxd (309) Embase**

60 exp Breast Neoplasms/ (863076)

61 (breast adj2 (cancer or neoplasm\* or tumor\* or carcinoma\*)).tw. (762057)

62 (breast and (cancer or neoplasm\* or tumor\* or carcinoma\*)).kw. (147066)

63 or/60-62 (1032386)

64 exp Aromatase Inhibitors/ (42347)

65 exp Tamoxifen/ (85879)  
 66 Aromatase Inhibitor\*.tw,kw. (21929)  
 67 (tamoxifen or anastrozole or exemestane or Fadrozole or formestane or intraovarian  
 peptides or letrozole or plomestane or vorozole).tw,kw. (74869)  
 68 Antineoplastic Agents, Hormonal/tu (10910)  
 69 ((hormon\* or endocrin\* or systemic) adj (treatment or therapy)).tw. (170669)  
 70 or/64-69 (287655)  
 71 63 and 70 (112917)  
 72 \*Time Factors/ (3708)  
 73 ("time of day" or time of administration).tw,kw. (34324)  
 74 Circadian Rhythm/ (166802)  
 75 chronobiology.mp. (7852)  
 76 (morning or night\*).tw,kw. (353070)  
 77 daytime.mp. (88880)  
 78 bedtime.mp. (23353)  
 79 chronotherapy.tw,kw. (2891)  
 80 evening.tw,kw. (56243)  
 81 (breakfast\* or supper\*).tw,kw. (33205)  
 82 chronotherapy/ or drug chronotherapy/ (5382)  
 83 (chronopharmacokinetic\* or chronopharmacolog\*).tw,kw. (1891)  
 84 or/72-83 (613734)  
 85 71 and 84 (664)  
 86 limit 85 to english language (605)  
 87 **86 use cctr (74) Cochrane**  
 88 31 or 59 or 87 (528)  
 89 remove duplicates from 88 (361)  
 90 **89 use medall (144) Medline**  
 91 **89 use emczd (182) Embase**  
 92 **89 use cctr (35) Cochrane**
