# Supplementary material for: Does the Time of Day at Which Endocrine Therapy Is Taken Affect Breast Cancer Patient Outcomes?
Source: MDPI journal article supplement (doi:10.3390/curroncol28040229), 2021-07-06
Supplement: s1 [file s1]

## Supplemental Figure S2: Search Strategy 2

Database: Embase Classic+Embase <1947 to 2020 December 31> , Ovid MEDLINE(R) ALL <1946 to December 31, 2020>, EBM Reviews - Cochrane Central Register of Controlled Trials <November 2020>

Search Strategy:

- 
- 1 exp Breast Neoplasms/ (882626)
  - 2 (breast adj2 (cancer or neoplasm\* or tumor?r\* or carcinoma\*)).tw. (793981)
  - 3 (breast and (cancer or neoplasm\* or tumor?r\* or carcinoma\*)).kf. (63717)
  - 4 or/1-3 (1058398)
  - 5 exp Aromatase Inhibitors/ (43237)
  - 6 Aromatase inhibitor\*.tw,kw. (22474)
  - 7 exp Tamoxifen/ (87140)
  - 8 (tamoxifen or anastrozole or exemestane or Fadrozole or formestane or intraovarian peptides or letrozole or plomestane or vorozole).tw,kw. (76393)
  - 9 Antineoplastic Agents, Hormonal/tu (11032)
  - 10 ((hormon\* or endocrin\* or systemic) adj (treatment or therapy)).tw. (176194)
  - 11 or/5-10 (295222)
  - 12 4 and 11 (115402)
  - 13 \*Time Factors/ (3935)
  - 14 "time of day".tw,kw. (26413)
  - 15 time of administration.tw,kw. (9006)
  - 16 Circadian Rhythm/ or Circadian.tw,kf. or chronomodulate\*.tw,kf. (205621)
  - 17 chronobiology.mp. (7973)
  - 18 (morning or night\*).tw,kw. (362566)
  - 19 daytime.mp. or Diurnal\*.tw,kw. (153644)
  - 20 bedtime.mp. (24072)
  - 21 (chronotherap\* or chrono therap\*).tw,kw. (3986)
  - 22 evening.tw,kw. (57606)
  - 23 (breakfast\* or supper\*).tw,kw. (34164)
  - 24 chronotherapy/ or drug chronotherapy/ (5455)
  - 25 (chronopharmacokinetic\* or chronopharmacolog\* or chrono pharmaco\*).tw,kw. (1973)
  - 26 or/13-25 (676078)
  - 27 12 and 26 (698)
  - 28 exp animals/ not humans/ (18660438)
  - 29 27 not 28 (488)
  - 30 limit 29 to english language (429)
  - 31 **30 use medall (155) Medline**
  - 32 exp \*breast cancer/ (576342)
  - 33 (breast adj2 (cancer or neoplasm\* or tumor?r\* or carcinoma\*)).tw. (793981)
  - 34 32 or 33 (898120)
  - 35 \*cancer hormone therapy/ (4696)
  - 36 exp aromatase inhibitor/ or aromatase inhibitor\*.tw. (48821)
  - 37 tamoxifen/ (84916)
  - 38 (tamoxifen or anastrozole or exemestane or Fadrozole or formestane or intraovarian peptides or letrozole or plomestane or vorozole).tw. (75479)
  - 39 \*"antineoplastic hormone agonists and antagonists"/ (1686)
  - 40 ((hormon\* or endocrin\* or systemic) adj (treatment or therapy)).tw. (176194)
  - 41 or/35-40 (290004)
  - 42 34 and 41 (105785)
  - 43 circadian rhythm/ (169257)
  - 44 "time of day".tw. (26322)
  - 45 chronobiology.tw. (2842)
  - 46 chronobiology/ (3454)
  - 47 (morning or night\* or diurnal\*).tw. (408595)



48 (daytime or bedtime).tw. (102306)  
 49 (evening or circadian or chronomodulate\*).tw. (169578)  
 50 (breakfast\* or supper\*).tw. (34046)  
 51 chronotherapy/ or chronopharmacology/ (5313)  
 52 (chronotherap\* or chronopharmacokinetic\* or chronopharmacolog\*).tw. (4705)  
 53 \*time factor/ (3994)  
 54 or/43-53 (655791)  
 55 42 and 54 (591)  
 56 (exp animal/ or nonhuman/) not exp human/ (12096945)  
 57 55 not 56 (584)  
 58 limit 57 to english language (528)  
 59 **58 use emczd (331) Embase**  
 60 exp Breast Neoplasms/ (882626)  
 61 (breast adj2 (cancer or neoplasm\* or tumor\* or carcinoma\*)).tw. (783883)  
 62 (breast and (cancer or neoplasm\* or tumor\* or carcinoma\*)).kw. (152567)  
 63 or/60-62 (1058250)  
 64 exp Aromatase Inhibitors/ (43237)  
 65 exp Tamoxifen/ (87140)  
 66 Aromatase Inhibitor\*.tw,kw. (22474)  
 67 (tamoxifen or anastrozole or exemestane or Fadrozole or formestane or intraovarian  
 peptides or letrozole or plomestane or vorozole).tw,kw. (76393)  
 68 Antineoplastic Agents, Hormonal/tu (11032)  
 69 ((hormon\* or endocrin\* or systemic) adj (treatment or therapy)).tw. (176194)  
 70 or/64-69 (295222)  
 71 63 and 70 (115521)  
 72 \*Time Factors/ (3935)  
 73 ("time of day" or time of administration).tw,kw. (35321)  
 74 Circadian Rhythm/ (169257)  
 75 chronobiology.mp. (7973)  
 76 (morning or night\*).tw,kw. (362566)  
 77 daytime.mp. or diurnal\*.tw,kw. (153644)  
 78 bedtime.mp. (24072)  
 79 chronotherapy.tw,kw. (2997)  
 80 evening.tw,kw. (57606)  
 81 (breakfast\* or supper\*).tw,kw. (34164)  
 82 chronotherapy/ or drug chronotherapy/ (5455)  
 83 (chronopharmacokinetic\* or chronopharmacolog\*).tw,kw. (1913)  
 84 (circadian or chronomodulate\*).tw,kw. (124315)  
 85 or/72-84 (676404)  
 86 71 and 85 (703)  
 87 limit 86 to english language (641)  
 88 **87 use cctr (71) Cochrane**  
 89 31 or 59 or 88 (557)  
 90 remove duplicates from 89 (379)  
 91 **90 use medall (155) Medline**  
 92 **90 use emczd (193) Embase**  
 93 **90 use cctr (31) Cochrane**
